# Supplementary material for: Genome-Wide Identification of Susceptibility Alleles for Viral Infections through a Population Genetics Approach
Source: PubMed Central journal article supplement (PMC2824813; doi:10.1371/journal.pgen.1000849), 2010-02-19
Supplement: pgen.1000849.s001.pdf [file pgen.1000849.s001.pdf]

**Table S1. SNPs in InnateDB genes that significantly correlate with virus diversity.**

| SNP        | Gene             | Annotation <sup>a</sup>   | $\tau$ | <i>p</i> value |
|------------|------------------|---------------------------|--------|----------------|
| rs993715   | <i>CNTNAP2</i>   | intron                    | 0.6085 | 0.00015260     |
| rs2189883  | <i>CNTNAP2</i>   | intron                    | 0.6081 | 0.00014171     |
| rs3785415  | <i>CDH15</i>     | intron                    | 0.6032 | 0.00016120     |
| rs4575989  | <i>C1QTNF7</i>   | intron                    | 0.5965 | 0.00022806     |
| rs7637370  | <i>CLDN18</i>    | intron                    | 0.5960 | 0.00023918     |
| rs4629443  | <i>C1QTNF7</i>   | intron                    | 0.5955 | 0.00023966     |
| rs7927476  | <i>NELL1</i>     | intron                    | 0.5934 | 0.00028950     |
| rs1065154  | <i>SQSTM1</i>    | 3' UTR                    | 0.5893 | 0.00040041     |
| rs12145973 | <i>IL19</i>      | intron                    | 0.5890 | 0.00310987     |
| rs4953260  | <i>PRKCE</i>     | intron                    | 0.5872 | 0.00043864     |
| rs4077341  | <i>TNFRSF10C</i> | intron                    | 0.5869 | 0.00044225     |
| rs2793434  | <i>GPLD1</i>     | intron                    | 0.5866 | 0.00040744     |
| rs6599300  | <i>MAEA</i>      | intron                    | 0.5843 | 0.00051153     |
| rs13340461 | <i>CCND3</i>     | intron                    | 0.5840 | 0.00062923     |
| rs10849446 | <i>SCNN1A</i>    | intron                    | 0.5831 | 0.00055910     |
| rs12186418 | <i>PDZD2</i>     | intron                    | 0.5831 | 0.00049477     |
| rs4698103  | <i>C1QTNF7</i>   | intron                    | 0.5825 | 0.00051729     |
| rs17282579 | <i>CLDN18</i>    | intron                    | 0.5806 | 0.00072735     |
| rs2600306  | <i>CNTN4</i>     | intron                    | 0.5800 | 0.00065050     |
| rs700550   | <i>LRP2</i>      | intron                    | 0.5777 | 0.00074769     |
| rs971403   | <i>LAMA4</i>     | intron                    | 0.5776 | 0.00087172     |
| rs2659501  | <i>PPP3CA</i>    | intron                    | 0.5771 | 0.00075242     |
| rs2016977  | <i>ST8SIA1</i>   | intron                    | 0.5738 | 0.00281559     |
| rs3782525  | <i>ST8SIA1</i>   | intron                    | 0.5738 | 0.00281559     |
| rs4130023  | <i>CCND3</i>     | intron, phastCons element | 0.5725 | 0.00120410     |
| rs1346690  | <i>NELL1</i>     | intron                    | 0.5724 | 0.00099399     |
| rs2527049  | <i>CNTNAP2</i>   | intron                    | 0.5719 | 0.00138919     |
| rs5917027  | <i>CLDN2</i>     | intron                    | 0.5718 | 0.00194824     |
| rs1874108  | <i>FREM1</i>     | intron, phastCons element | 0.5711 | 0.00117500     |
| rs1055636  | <i>SLFN5</i>     | 3' UTR                    | 0.5705 | 0.00177587     |
| rs2714174  | <i>LRP1B</i>     | intron                    | 0.5702 | 0.00118573     |
| rs1402470  | <i>LRP1B</i>     | intron                    | 0.5685 | 0.00140795     |
| rs1922889  | <i>CNTNAP2</i>   | intron                    | 0.5682 | 0.00156774     |
| rs11242715 | <i>GMDS</i>      | intron                    | 0.5661 | 0.00167284     |
| rs7712010  | <i>PDZD2</i>     | intron                    | 0.5659 | 0.00150229     |

|            |                 |                           |        |            |
|------------|-----------------|---------------------------|--------|------------|
| rs17656058 | <i>CLEC4F</i>   | intron, phastCons element | 0.5655 | 0.00279468 |
| rs708228   | <i>CTNND1</i>   | 3' UTR, phastCons element | 0.5647 | 0.00210315 |
| rs13182372 | <i>PDZD2</i>    | intron                    | 0.5646 | 0.00171276 |
| rs4698374  | <i>C1QTNF7</i>  | intron                    | 0.5642 | 0.00151817 |
| rs2683824  | <i>LRP1B</i>    | intron                    | 0.5629 | 0.00179731 |
| rs2501254  | <i>HSPG2</i>    | intron                    | 0.5595 | 0.00191694 |
| rs12568035 | <i>LAMB3</i>    | intron                    | 0.5575 | 0.00322326 |
| rs2275254  | <i>CHIA</i>     | F354S                     | 0.5571 | 0.00220021 |
| rs3856982  | <i>MAEA</i>     | intron                    | 0.5565 | 0.00249450 |
| rs2850350  | <i>PPP3CA</i>   | intron                    | 0.5564 | 0.00220599 |
| rs1848116  | <i>PPP3CA</i>   | intron                    | 0.5563 | 0.00239862 |
| rs7736502  | <i>PDZD2</i>    | intron                    | 0.5559 | 0.00260144 |
| rs7107376  | <i>FCHSD2</i>   | intron                    | 0.5558 | 0.00339272 |
| rs2707575  | <i>CNTNAP2</i>  | intron                    | 0.5550 | 0.00312479 |
| rs1061631  | <i>TNFRSF1B</i> | 3' UTR                    | 0.5547 | 0.00465174 |
| rs2850976  | <i>PPP3CA</i>   | intron                    | 0.5544 | 0.00242220 |
| rs1138803  | <i>GMDS</i>     | intron                    | 0.5540 | 0.00263712 |
| rs953035   | <i>PSMB2</i>    | intron                    | 0.5532 | 0.00286997 |
| rs980618   | <i>IL16</i>     | intron                    | 0.5524 | 0.00300278 |
| rs2541886  | <i>UNG</i>      | intron                    | 0.5519 | 0.00339001 |
| rs12879377 | <i>GALNTL1</i>  | M201V                     | 0.5512 | 0.00488440 |
| rs10857274 | <i>DCHS2</i>    | intron                    | 0.5506 | 0.00328931 |
| rs4386     | <i>TOM1</i>     | intron                    | 0.5506 | 0.00328721 |
| rs7695691  | <i>MAEA</i>     | intron                    | 0.5496 | 0.00357637 |
| rs565280   | <i>SQSTM1</i>   | intron                    | 0.5490 | 0.00374946 |
| rs2275603  | <i>FCRLA</i>    | S203G                     | 0.5484 | 0.00388369 |
| rs372454   | <i>MMD2</i>     | 3' UTR                    | 0.5477 | 0.00392815 |
| rs11771941 | <i>CNTNAP2</i>  | intron                    | 0.5477 | 0.00487690 |
| rs7121400  | <i>NELL1</i>    | intron                    | 0.5473 | 0.00410900 |
| rs4782496  | <i>CBFA2T3</i>  | intron                    | 0.5462 | 0.00483234 |
| rs10502966 | <i>DCC</i>      | intron                    | 0.5453 | 0.00854755 |
| rs11160322 | <i>BDKRB2</i>   | intron                    | 0.5451 | 0.00487070 |
| rs6706275  | <i>HDAC4</i>    | intron                    | 0.5435 | 0.00718766 |
| rs9985234  | <i>LPP</i>      | intron                    | 0.5423 | 0.00981179 |
| rs2037407  | <i>LIN7A</i>    | intron                    | 0.5423 | 0.00576535 |
| rs6942912  | <i>CNTNAP2</i>  | intron                    | 0.5421 | 0.00596000 |
| rs2708285  | <i>CNTNAP2</i>  | intron                    | 0.5420 | 0.00596000 |

|            |                  |                           |        |            |
|------------|------------------|---------------------------|--------|------------|
| rs2205084  | <i>DSCAM</i>     | intron                    | 0.5412 | 0.00605740 |
| rs1333399  | <i>TOM1</i>      | intron                    | 0.5410 | 0.00605864 |
| rs10178342 | <i>LRP1B</i>     | intron                    | 0.5410 | 0.00539363 |
| rs1351026  | <i>PPFIBP1</i>   | intron                    | 0.5410 | 0.00539697 |
| rs13329773 | <i>CBFA2T3</i>   | intron                    | 0.5407 | 0.00677315 |
| rs11049057 | <i>PPFIBP1</i>   | intron                    | 0.5406 | 0.00607606 |
| rs4411113  | <i>DDR2</i>      | intron                    | 0.5404 | 0.00608105 |
| rs2583401  | <i>PPP3CA</i>    | intron                    | 0.5402 | 0.00542488 |
| rs822577   | <i>ARHGEF11</i>  | intron                    | 0.5396 | 0.00589956 |
| rs10911812 | <i>HMCN1</i>     | intron                    | 0.5396 | 0.00589231 |
| rs3824988  | <i>SERPING1</i>  | intron                    | 0.5396 | 0.00894839 |
| rs7954545  | <i>PKP2</i>      | intron                    | 0.5390 | 0.00638318 |
| rs3217881  | <i>CCND2</i>     | intron                    | 0.5386 | 0.00689978 |
| rs139149   | <i>PARVG</i>     | intron                    | 0.5382 | 0.00642763 |
| rs2796813  | <i>TGFB2</i>     | intron                    | 0.5380 | 0.00722204 |
| rs448849   | <i>CLDN14</i>    | intron                    | 0.5376 | 0.00698720 |
| rs531071   | <i>NEGR1</i>     | intron, phastCons element | 0.5374 | 0.00751769 |
| rs4651292  | <i>HMCN1</i>     | intron                    | 0.5365 | 0.00758328 |
| rs183156   | <i>PDZD2</i>     | intron                    | 0.5361 | 0.00732365 |
| rs419941   | <i>CLDN14</i>    | intron                    | 0.5361 | 0.00732365 |
| rs870144   | <i>ADARB1</i>    | intron                    | 0.5361 | 0.00732365 |
| rs8106303  | <i>FXYD5</i>     | intron                    | 0.5349 | 0.00920391 |
| rs2526121  | <i>SEMA5A</i>    | intron                    | 0.5345 | 0.00769579 |
| rs878949   | <i>HSPG2</i>     | intron                    | 0.5343 | 0.00768806 |
| rs10842938 | <i>PPFIBP1</i>   | intron                    | 0.5341 | 0.00770357 |
| rs3128575  | <i>COL5A1</i>    | 3' UTR, phastCons element | 0.5335 | 0.00862800 |
| rs8023564  | <i>AQP9</i>      | intron                    | 0.5333 | 0.00972604 |
| rs11049046 | <i>PPFIBP1</i>   | intron                    | 0.5325 | 0.00840894 |
| rs2289239  | <i>POLR1A</i>    | intron                    | 0.5325 | 0.00975703 |
| rs3773768  | <i>CLDN18</i>    | intron                    | 0.5325 | 0.00944358 |
| rs1203148  | <i>KIAA0319L</i> | intron                    | 0.5302 | 0.00957781 |
| rs12920161 | <i>CDH13</i>     | intron                    | 0.5298 | 0.00998214 |

\*The aminoacid substitution is reported for nonsynonymous SNPs; SNPs annotated as "phastCons element" are located within non-coding genomic regions that display high sequence conservation among mammals (as described in the text).
