# Supplementary material for: Genome-Wide Identification of Susceptibility Alleles for Viral Infections through a Population Genetics Approach
Source: PubMed Central journal article supplement (PMC2824813; doi:10.1371/journal.pgen.1000849), 2010-02-19
Supplement: pgen.1000849.s003.pdf [file pgen.1000849.s003.pdf]

**Table S3. SNPs in genes coding for proteins interacting with viral products that significantly correlate with virus diversity.**

| SNP        | Gene           | Annotation <sup>a</sup>   | $\tau$ | <i>p</i> value |
|------------|----------------|---------------------------|--------|----------------|
| rs1135029  | <i>PDE2A</i>   | A867A                     | 0.6146 | 0.00002353     |
| rs11235559 | <i>PDE2A</i>   | intron                    | 0.6083 | 0.00002950     |
| rs189332   | <i>PDE2A</i>   | intron                    | 0.5984 | 0.00005568     |
| rs1890139  | <i>PCCA</i>    | intron                    | 0.5883 | 0.00010822     |
| rs10898866 | <i>CENTD2</i>  | intron                    | 0.5753 | 0.00023944     |
| rs1986656  | <i>TMEM110</i> | intron                    | 0.5747 | 0.00096853     |
| rs11150843 | <i>GAA</i>     | R223H                     | 0.5717 | 0.00027879     |
| rs10793036 | <i>PDE2A</i>   | intron                    | 0.5619 | 0.00048208     |
| rs10510499 | <i>PCAF</i>    | 3' UTR                    | 0.5587 | 0.00928330     |
| rs2559658  | <i>POLR3A</i>  | intron                    | 0.5583 | 0.00158061     |
| rs677344   | <i>VPS16</i>   | intron                    | 0.5550 | 0.00077076     |
| rs2192973  | <i>GRIN2B</i>  | intron                    | 0.5542 | 0.00079250     |
| rs3784064  | <i>SIPA1L1</i> | intron                    | 0.5535 | 0.00135324     |
| rs2525570  | <i>NF1</i>     | intron                    | 0.5506 | 0.00077971     |
| rs6138953  | <i>PTPRA</i>   | intron                    | 0.5496 | 0.00377280     |
| rs765688   | <i>GRIN2B</i>  | intron, phastCons element | 0.5483 | 0.00428444     |
| rs1204997  | <i>SIPA1L1</i> | intron                    | 0.5470 | 0.00192983     |
| rs1204995  | <i>SIPA1L1</i> | intron                    | 0.5470 | 0.00192983     |
| rs133290   | <i>SREBF2</i>  | intron                    | 0.5462 | 0.00118971     |
| rs2781064  | <i>ENO1</i>    | intron                    | 0.5459 | 0.00114544     |
| rs341087   | <i>PDE2A</i>   | intron                    | 0.5457 | 0.00106212     |
| rs2193151  | <i>GRIN2B</i>  | intron                    | 0.5447 | 0.00511533     |
| rs3784929  | <i>KARS</i>    | intron                    | 0.5447 | 0.00111157     |
| rs6491544  | <i>PCCA</i>    | intron                    | 0.5445 | 0.00120365     |
| rs2290559  | <i>SPTBN5</i>  | R1310H                    | 0.5427 | 0.00222867     |
| rs7318781  | <i>PCCA</i>    | intron                    | 0.5415 | 0.00148739     |
| rs2783224  | <i>PCCA</i>    | intron                    | 0.5402 | 0.00155719     |
| rs1339249  | <i>PCSK5</i>   | intron                    | 0.5400 | 0.00145279     |
| rs1573994  | <i>ITPR2</i>   | intron, phastCons element | 0.5390 | 0.00163913     |
| rs378759   | <i>GTF2E1</i>  | intron                    | 0.5386 | 0.00152222     |
| rs613075   | <i>MGAT5B</i>  | intron                    | 0.5382 | 0.00164549     |
| rs9518023  | <i>PCCA</i>    | intron                    | 0.5382 | 0.00158834     |
| rs2216128  | <i>GRIN2B</i>  | intron                    | 0.5380 | 0.00171647     |
| rs10493066 | <i>SFPQ</i>    | intron                    | 0.5379 | 0.00152690     |

|            |                |                           |        |            |
|------------|----------------|---------------------------|--------|------------|
| rs1981929  | <i>MSH2</i>    | intron                    | 0.5363 | 0.00200132 |
| rs9383562  | <i>AKAP12</i>  | intron                    | 0.5329 | 0.00248404 |
| rs16988201 | <i>PTPRA</i>   | intron                    | 0.5324 | 0.00488301 |
| rs1045580  | <i>RPA3</i>    | intron                    | 0.5320 | 0.00270437 |
| rs547976   | <i>SFRS4</i>   | intron                    | 0.5308 | 0.00317025 |
| rs684215   | <i>PCCA</i>    | intron                    | 0.5302 | 0.00264730 |
| rs9857526  | <i>ADCY5</i>   | intron                    | 0.5294 | 0.00340934 |
| rs458275   | <i>PDE2A</i>   | intron                    | 0.5286 | 0.00278651 |
| rs656024   | <i>MGAT5B</i>  | intron                    | 0.5280 | 0.00279309 |
| rs10493067 | <i>SFPQ</i>    | intron, phastCons element | 0.5270 | 0.00281069 |
| rs17080169 | <i>RFC3</i>    | intron                    | 0.5267 | 0.00304077 |
| rs1590345  | <i>GSN</i>     | intron                    | 0.5261 | 0.00342262 |
| rs532751   | <i>RPS3</i>    | intron                    | 0.5257 | 0.00477382 |
| rs3746692  | <i>PTPRA</i>   | intron                    | 0.5256 | 0.00687662 |
| rs12212415 | <i>NUP43</i>   | intron                    | 0.5234 | 0.00874523 |
| rs11775890 | <i>EIF3S3</i>  | intron                    | 0.5216 | 0.00422599 |
| rs9841477  | <i>ADCY5</i>   | intron                    | 0.5208 | 0.00427301 |
| rs2620386  | <i>PLA2G4F</i> | intron                    | 0.5196 | 0.00430490 |
| rs11045355 | <i>PDE3A</i>   | intron                    | 0.5167 | 0.00983470 |
| rs555414   | <i>VPS16</i>   | intron                    | 0.5166 | 0.00490839 |
| rs2242107  | <i>NR4A1</i>   | intron, phastCons element | 0.5161 | 0.00564583 |
| rs341086   | <i>PDE2A</i>   | intron                    | 0.5159 | 0.00571697 |
| rs729916   | <i>PDE1C</i>   | intron                    | 0.5156 | 0.00532810 |
| rs7953019  | <i>PTPRO</i>   | intron                    | 0.5152 | 0.00533911 |
| rs9910060  | <i>MGAT5B</i>  | intron                    | 0.5152 | 0.00533011 |
| rs12019900 | <i>PCCA</i>    | intron                    | 0.5151 | 0.00616792 |
| rs6491545  | <i>PCCA</i>    | intron                    | 0.5100 | 0.00578030 |
| rs3115876  | <i>CAPN3</i>   | intron                    | 0.5143 | 0.00619320 |
| rs7257503  | <i>IL4I1</i>   | intron                    | 0.5134 | 0.00719180 |
| rs7818703  | <i>SNTB1</i>   | intron                    | 0.5133 | 0.00603412 |
| rs4787963  | <i>GTF3C1</i>  | intron                    | 0.5133 | 0.00818659 |
| rs596662   | <i>PDE4B</i>   | intron                    | 0.5122 | 0.00729566 |
| rs9442     | <i>ITPR2</i>   | intron                    | 0.5121 | 0.00744518 |
| rs2220168  | <i>ITPR2</i>   | intron                    | 0.5121 | 0.00607126 |
| rs2559825  | <i>POLR3A</i>  | intron                    | 0.5113 | 0.00657438 |
| rs6056505  | <i>PLCB4</i>   | intron                    | 0.5107 | 0.00685158 |
| rs11929107 | <i>PLS1</i>    | intron                    | 0.5103 | 0.00841831 |

|           |              |        |        |            |
|-----------|--------------|--------|--------|------------|
| rs1888049 | <i>RFC3</i>  | intron | 0.5074 | 0.00811002 |
| rs2265520 | <i>VAV2</i>  | intron | 0.5073 | 0.00781512 |
| rs885219  | <i>POMP</i>  | intron | 0.5072 | 0.00840051 |
| rs9528255 | <i>RFC3</i>  | intron | 0.5062 | 0.00876915 |
| rs6037443 | <i>PTPRA</i> | intron | 0.5060 | 0.00848320 |
| rs6664461 | <i>CAPZB</i> | intron | 0.5057 | 0.00946298 |
| rs6977381 | <i>ABP1</i>  | intron | 0.5053 | 0.00986581 |
| rs6562150 | <i>RFC3</i>  | intron | 0.5033 | 0.00997433 |
| rs2512450 | <i>MTDH</i>  | intron | 0.5031 | 0.00999221 |

---

<sup>a</sup>The aminoacid substitution is reported for nonsynonymous SNPs; SNPs annotated as "phastCons element" are located within non-coding genomic regions that display high sequence conservation among mammals (as described in the text).
